# Supplementary material
Source: HighWire-hosted journal article supplement (https://bmjopen.bmj.com/content/12/4/e059684)
Supplement: inline-supplementary-material-1 [file inline-supplementary-material-1.pdf]

## Supplementary Tables/Information

**Supplementary Table 1:** The factors associated with disability at discharge from inpatient stroke care hospital for Physiotherapy, Occupational Therapy, Speech and Language Therapy and Psychology – As produced from the single fully adjusted multilevel mixed effects ordinal logistic regression model.

| Disability on Discharge (mRS)              |                     | Physiotherapy<br>N=96537<br>Coef(95% C.I.) | Occupational<br>Therapy<br>N=92542<br>Coef(95% C.I.) | Speech and<br>Language Therapy<br>N=61206<br>Coef(95% C.I.) | Psychology<br>6074<br>Coef(95% C.I.) |
|--------------------------------------------|---------------------|--------------------------------------------|------------------------------------------------------|-------------------------------------------------------------|--------------------------------------|
| Average Minutes of Therapy per Day of Stay |                     | 1.009(1.008,1.010)                         | 0.979(0.978,0.980)                                   | 0.975(0.974,0.977)                                          | 0.945(0.934,0.955)                   |
| <b>Admission related factors</b>           |                     |                                            |                                                      |                                                             |                                      |
| Team Count                                 |                     | 0.92(0.86,0.99)                            | 1.001(0.931,1.077)                                   | 0.98(0.90,1.06)                                             | 0.90(0.73,1.10)                      |
| Time from Entry                            |                     | 1.009(1.005,1.014)                         | 1.01(1.01,1.02)                                      | 1.01(1.00,1.01)                                             | 1.006(0.994,1.018)                   |
| Day of Entry (Mon)                         |                     |                                            |                                                      |                                                             |                                      |
|                                            | Tuesday             | 0.995(0.955,1.037)                         | 0.99(0.95,1.03)                                      | 0.99(0.94,1.04)                                             | 0.95(0.81,1.13)                      |
|                                            | Wednesday           | 0.997(0.956,1.040)                         | 0.96(0.92,1.01)                                      | 0.98(0.93,1.03)                                             | 0.88(0.74,1.04)                      |
|                                            | Thursday            | 0.91(0.87,0.95)                            | 0.88(0.84,0.91)                                      | 0.89(0.84,0.93)                                             | 0.99(0.83,1.17)                      |
|                                            | Friday              | 0.83(0.80,0.86)                            | 0.80(0.77,0.84)                                      | 0.82(0.77,0.86)                                             | 0.85(0.72,1.00)                      |
|                                            | Saturday            | 0.96(0.92,1.01)                            | 0.94(0.90,0.99)                                      | 0.97(0.92,1.02)                                             | 1.09(0.91,1.31)                      |
|                                            | Sunday              | 1.02(0.98,1.07)                            | 1.04(1.00,1.09)                                      | 1.05(0.99,1.10)                                             | 0.93(0.78,1.11)                      |
| Time from entry to 1st Stroke Unit         |                     | 1.001(1.000,1.001)                         | 1.000(1.000,1.001)                                   | 1.000(1.000,1.000)                                          | 1.001(1.000,1.002)                   |
| Time of Entry(00.00-07.59)                 |                     |                                            |                                                      |                                                             |                                      |
|                                            | 08:00+              | 0.86(0.83,0.90)                            | 0.83(0.80,0.86)                                      | 0.85(0.81,0.89)                                             | 0.86(0.75,0.99)                      |
|                                            | 16:00+              | 0.92(0.89,0.96)                            | 0.91(0.87,0.94)                                      | 0.92(0.87,0.96)                                             | 0.88(0.75,1.02)                      |
| <b>Patient-related factors</b>             |                     |                                            |                                                      |                                                             |                                      |
| Age                                        |                     | 0.98(0.97,0.98)                            | 0.98(0.98,0.99)                                      | 0.97(0.97,0.98)                                             | 1.01(0.99,1.04)                      |
| Age Squared                                |                     | 1.000(1.000,1.000)                         | 1.000(1.000,1.000)                                   | 1.000(1.000,1.000)                                          | 1.000(1.000,1.000)                   |
| Gender (Female)                            |                     |                                            |                                                      |                                                             |                                      |
|                                            | Male                | 1.005(0.982,1.029)                         | 0.99(0.96,1.01)                                      | 1.03(1.00,1.06)                                             | 1.005(0.914,1.105)                   |
| Ethnicity (White)                          |                     |                                            |                                                      |                                                             |                                      |
|                                            | asian, inc. chinese | 0.98(0.92,1.04)                            | 0.98(0.91,1.04)                                      | 0.94(0.87,1.02)                                             | 1.01(0.79,1.29)                      |
|                                            | black               | 1.14(1.05,1.25)                            | 1.14(1.05,1.24)                                      | 1.12(1.01,1.23)                                             | 1.04(0.82,1.33)                      |
|                                            | mixed               | 1.13(0.93,1.36)                            | 1.13(0.94,1.37)                                      | 0.99(0.77,1.26)                                             | 0.80(0.44,1.46)                      |
|                                            | not known           | 1.04(0.99,1.09)                            | 1.03(0.98,1.09)                                      | 1.01(0.95,1.08)                                             | 1.02(0.85,1.22)                      |

|                                                 |                          |                 |                    |                    |                    |
|-------------------------------------------------|--------------------------|-----------------|--------------------|--------------------|--------------------|
|                                                 | other                    | 0.98(0.90,1.07) | 0.97(0.88,1.06)    | 0.97(0.87,1.08)    | 1.03(0.76,1.40)    |
| Social Deprivation Highest to Lowest (1)        | 2                        | 0.99(0.95,1.02) | 0.99(0.95,1.02)    | 0.99(0.95,1.03)    | 1.02(0.89,1.17)    |
|                                                 | 3                        | 0.99(0.96,1.03) | 1.000(0.964,1.036) | 0.99(0.95,1.03)    | 1.05(0.91,1.22)    |
|                                                 | 4                        | 0.96(0.93,1.00) | 0.98(0.94,1.02)    | 0.97(0.92,1.01)    | 1.12(0.96,1.31)    |
|                                                 | Missing                  | 0.95(0.88,1.03) | 0.93(0.85,1.01)    | 0.92(0.83,1.02)    | 0.84(0.63,1.12)    |
|                                                 | Congestive Heart Failure | Yes             | 1.17(1.12,1.23)    | 1.13(1.08,1.19)    | 1.23(1.15,1.31)    |
| Hypertension                                    | Yes                      | 0.96(0.94,0.99) | 0.97(0.95,1.00)    | 0.95(0.92,0.98)    | 1.03(0.94,1.14)    |
| Atrial Fibrillation                             | Yes                      | 1.10(1.06,1.13) | 1.06(1.03,1.09)    | 1.11(1.08,1.15)    | 1.05(0.93,1.19)    |
| Diabetes                                        | Yes                      | 1.14(1.11,1.17) | 1.12(1.09,1.16)    | 1.10(1.06,1.14)    | 1.12(1.00,1.26)    |
| Previous Stroke/TIA?                            | Yes                      | 0.95(0.93,0.98) | 0.94(0.92,0.97)    | 0.94(0.91,0.97)    | 1.003(0.899,1.118) |
| Disability at transfer from previous team (mRS) | 1                        | 0.69(0.51,0.93) | 0.68(0.50,0.92)    | 0.72(0.49,1.04)    | 0.85(0.34,2.13)    |
|                                                 | 2                        | 0.91(0.69,1.18) | 0.97(0.74,1.27)    | 1.04(0.75,1.43)    | 1.02(0.46,2.25)    |
|                                                 | 3                        | 1.53(1.18,1.99) | 1.64(1.26,2.14)    | 1.53(1.12,2.11)    | 1.57(0.72,3.42)    |
|                                                 | 4                        | 2.7(2.1,3.5)    | 2.8(2.2,3.7)       | 2.5(1.9,3.5)       | 2.7(1.3,5.9)       |
|                                                 | 5                        | 5.4(4.1,7.1)    | 5.3(4.0,7.0)       | 4.5(3.3,6.2)       | 6.4(2.9,13.9)      |
| Pre-morbid disability (mRS, 0)                  | 1                        | 1.47(1.42,1.52) | 1.42(1.37,1.47)    | 1.35(1.29,1.41)    | 1.22(1.07,1.39)    |
|                                                 | 2                        | 2.17(2.09,2.25) | 2.11(2.03,2.19)    | 1.88(1.79,1.98)    | 1.50(1.28,1.75)    |
|                                                 | 3                        | 3.2(3.1,3.3)    | 3.0(2.9,3.1)       | 2.6(2.5,2.7)       | 2.6(2.2,3.1)       |
|                                                 | 4                        | 4.9(4.6,5.1)    | 4.6(4.3,4.8)       | 3.8(3.5,4.0)       | 3.1(2.5,4.0)       |
|                                                 | 5                        | 6.3(5.8,6.9)    | 6.0(5.5,6.6)       | 4.6(4.1,5.1)       | 7.8(4.4,14.0)      |
| Stroke Type (Infarction)                        | Haemorrhage              | 1.63(1.57,1.69) | 1.58(1.52,1.65)    | 1.49(1.42,1.56)    | 1.19(1.05,1.36)    |
| Stroke Severity (NIHSS, Mild)                   | Moderate(5-14)           | 1.51(1.40,1.62) | 1.47(1.37,1.58)    | 1.68(1.53,1.84)    | 1.55(1.26,1.90)    |
|                                                 | Severe(15-20)            | 2.5(2.3,2.8)    | 2.29(2.09,2.51)    | 2.6(2.3,2.9)       | 2.10(1.60,2.76)    |
|                                                 | Very Severe(>20)         | 2.34(2.10,2.60) | 2.13(1.91,2.38)    | 2.4(2.1,2.7)       | 1.76(1.28,2.41)    |
| Stroke Impairment Categories (Motor Only)       | Loss-Con                 | 1.34(1.25,1.44) | 1.13(1.04,1.21)    | 1.09(1.00,1.19)    | 0.93(0.69,1.26)    |
|                                                 | Mo-Co-Se                 | 1.06(1.01,1.10) | 1.01(0.97,1.05)    | 1.000(0.948,1.056) | 1.12(0.95,1.32)    |
|                                                 | Mo-Co                    | 1.01(0.97,1.05) | 0.92(0.89,0.96)    | 0.88(0.84,0.93)    | 0.95(0.80,1.11)    |
|                                                 | Mo-Se                    | 0.91(0.87,0.94) | 0.92(0.88,0.96)    | 0.95(0.89,1.01)    | 1.08(0.90,1.28)    |
|                                                 | No-Mo                    | 0.78(0.74,0.82) | 0.72(0.69,0.76)    | 0.71(0.66,0.76)    | 0.75(0.62,0.92)    |
|                                                 | None                     | 0.87(0.82,0.92) | 0.78(0.74,0.83)    | 1.23(1.13,1.34)    | 0.86(0.66,1.11)    |

| Organisation- related factors            |              |                    |                 |                    |                 |
|------------------------------------------|--------------|--------------------|-----------------|--------------------|-----------------|
| 72hr Swallow assess (No)                 | Yes          | 1.46(1.40,1.51)    | 1.18(1.14,1.23) | 1.74(1.66,1.82)    | 1.29(1.13,1.47) |
| 72hr Clinical Assessment(No)             | Yes          | 0.88(0.83,0.93)    | 0.72(0.68,0.76) | 0.98(0.93,1.03)    |                 |
| No. any assessments (0-3)                |              | 0.92(0.90,0.94)    | 1.09(1.06,1.11) | 0.81(0.79,0.83)    | 0.95(0.90,1.01) |
| Thrombolysis available (24hrs day)       | Non-24hrs/UA | 1.23(0.90,1.67)    | 1.28(0.93,1.75) | 1.11(0.82,1.51)    | 1.17(0.74,1.88) |
| Ward Round 7d per wk                     | Yes          | 0.999(0.816,1.224) | 1.03(0.83,1.27) | 0.93(0.77,1.14)    | 0.75(0.56,1.01) |
| Median Length of stay in Unit            |              | 0.99(0.97,1.01)    | 0.99(0.97,1.01) | 0.99(0.97,1.01)    | 0.98(0.95,1.00) |
| Team Type (RATa)                         | RATc         | 1.13(1.00,1.28)    | 1.12(0.99,1.26) | 1.10(0.96,1.26)    | 1.42(1.08,1.87) |
|                                          | NRAT         | 0.97(0.67,1.40)    | 1.05(0.71,1.54) | 0.98(0.67,1.42)    | 1.46(0.82,2.60) |
|                                          | NAIT         | 1.14(0.37,3.47)    | 1.87(0.59,5.87) | 1.22(0.41,3.60)    | 1.54(0.30,7.98) |
| Qualified Nurses (WTE/ 10bds)            |              | 1.01(0.98,1.05)    | 1.01(0.98,1.05) | 1.01(0.98,1.05)    | 1.03(0.98,1.07) |
| Nurse support workers (WTE/ 10bds)       |              | 0.94(0.90,0.99)    | 0.93(0.88,0.97) | 0.94(0.90,0.99)    | 0.96(0.90,1.03) |
| Qualified Therapists (WTE/ 10bds)        |              | 1.05(0.85,1.30)    | 1.27(1.03,1.55) | 1.23(0.90,1.67)    | 0.84(0.47,1.50) |
| Therapy support worker (WTE/ 10bds)      |              | 0.79(0.57,1.11)    | 1.13(0.87,1.46) | 1.006(0.611,1.657) | 3.3(0.8,12.9)   |
| No. Therapies available 6/7 days/ wk (0) | 1            | 0.90(0.68,1.18)    | 0.89(0.67,1.17) | 0.84(0.65,1.09)    | 0.92(0.63,1.36) |
|                                          | 2 or more    | 1.02(0.84,1.24)    | 1.06(0.86,1.30) | 0.99(0.82,1.19)    | 0.95(0.72,1.26) |
| Access to Social Wk in 5days (Yes)       | No           | 1.11(0.66,1.88)    | 1.19(0.70,2.05) | 1.10(0.66,1.82)    | 0.64(0.30,1.37) |
| Access to ESD Team                       | Non-spec ESD | 0.94(0.67,1.31)    | 0.99(0.70,1.39) | 1.08(0.78,1.49)    | 0.92(0.61,1.39) |
|                                          | None         | 0.98(0.78,1.24)    | 0.98(0.77,1.25) | 1.05(0.83,1.32)    | 0.71(0.49,1.04) |
| Access to CRT                            | Yes          | 0.93(0.77,1.12)    | 0.93(0.77,1.13) | 0.92(0.77,1.10)    | 0.85(0.65,1.12) |
| Constant                                 | Cut Point 1  | -1.77              | -1.75           | -2.37              | -1.48           |
|                                          | Cut Point 2  | -0.4               | -0.36           | -1.03              | -0.1            |
|                                          | Cut Point 3  | 0.54               | 0.6             | -0.12              | 1.02            |
|                                          | Cut Point 4  | 1.65               | 1.74            | 0.96               | 2.37            |
|                                          | Cut Point 5  | 3.18               | 3.35            | 2.49               | 4.37            |
|                                          | Cut Point 6  | 4.28               | 4.53            | 3.7                | 6.11            |
| Team                                     | Var(Cons)    | 0.31               | 0.34            | 0.29               | 0.27            |

SIC = NIHSS defined Stroke Impairment Category, Loss-Con = Any Loss of Consciousness, Motor = Motor only impairments (most common group), Mo-Co-Se = Motor + Cognitive + Sensory impairments, Mo-Co = Motor + Cognitive Impairments only, Mo-Se = Motor + Sensory Impairments only, No-Mo = Any other Non-motor impairment combination, mRS = modified Rankin Score, RATa = SSNAP defined Routinely Admitting Team with median length of stay <7days (i.e. approx acute care team), RATc = SSNAP defined RAT with median LOS>7days (i.e. approx. acute & rehab team), NRAT = SSNAP defined Non-RAT (i.e. inpatient team), NAIT = SSNAP Non Acute Inpatient Team (i.e. a rehab inpatient team), ESD = Early Support Discharge Team, CRT = Community Rehab team, WTE = Whole Time Equivalent, and NA = Not available or model dropped due to perfect prediction/collinearity.

**Supplementary Table 2:** The factors associated with inpatient length of stay for Physiotherapy, Occupational Therapy, Speech and Language Therapy and Psychology – As produced from the single fully adjusted multilevel mixed effects ordinal logistic regression model.

| Length of Inpatient Stay / Model Covariates (Ref Cat) |                     | Physiotherapy<br>N=96,537<br>RR(95% C.I.) | Occupational<br>Therapy<br>N=92,542<br>RR(95% C.I.) | Speech and Language<br>Therapy<br>N=61,206<br>RR(95% C.I.) | Psychology<br>N=6,074<br>RR(95% C.I.) |
|-------------------------------------------------------|---------------------|-------------------------------------------|-----------------------------------------------------|------------------------------------------------------------|---------------------------------------|
| Average Min Therapy per Day of Stay                   |                     | 0.994(0.994,0.995)                        | 0.981(0.982,0.982)                                  | 0.971(0.969,0.972)                                         | 0.932(0.928,0.936)                    |
| <b>Admission related factors</b>                      |                     |                                           |                                                     |                                                            |                                       |
| Team Count                                            |                     | 1.02(0.98,1.05)                           | 1.05(1.01,1.08)                                     | 1.03(0.99,1.07)                                            | 0.92(0.85,0.99)                       |
| Time from Entry                                       |                     | 1.008(1.006,1.010)                        | 1.007(1.005,1.009)                                  | 1.006(1.004,1.009)                                         | 1.007(1.002,1.011)                    |
| Day of Entry (Mon)                                    | Tuesday             | 1.02(1.00,1.04)                           | 1.02(1.00,1.04)                                     | 1.001(0.979,1.023)                                         | 1.007(0.951,1.066)                    |
|                                                       | Wednesday           | 1.03(1.01,1.05)                           | 1.01(1.00,1.03)                                     | 1.003(0.981,1.026)                                         | 0.99(0.94,1.05)                       |
|                                                       | Thursday            | 0.97(0.95,0.99)                           | 0.96(0.94,0.98)                                     | 0.95(0.93,0.97)                                            | 0.99(0.93,1.04)                       |
|                                                       | Friday              | 0.95(0.93,0.97)                           | 0.94(0.92,0.96)                                     | 0.96(0.94,0.98)                                            | 1.003(0.946,1.063)                    |
|                                                       | Saturday            | 0.98(0.96,1.00)                           | 0.97(0.95,0.99)                                     | 0.97(0.95,1.00)                                            | 1.02(0.96,1.08)                       |
|                                                       | Sunday              | 0.998(0.979,1.018)                        | 0.999(0.980,1.019)                                  | 0.999(0.976,1.022)                                         | 0.99(0.93,1.05)                       |
| Time from entry to 1st Stroke Unit                    |                     | 1.001(1.000,1.001)                        | 1.000(1.000,1.001)                                  | 1.000(1.000,1.000)                                         | 1.000(1.000,1.001)                    |
| Time of Entry(00.00-07.59am)                          | 08:00+              | 0.94(0.92,0.95)                           | 0.93(0.92,0.95)                                     | 0.96(0.94,0.98)                                            | 0.91(0.86,0.95)                       |
|                                                       | 16:00+              | 0.95(0.93,0.97)                           | 0.95(0.93,0.97)                                     | 0.98(0.96,1.00)                                            | 0.94(0.89,0.99)                       |
| <b>Patient-related factors</b>                        |                     |                                           |                                                     |                                                            |                                       |
| Age                                                   |                     | 1.01(1.01,1.01)                           | 1.01(1.01,1.01)                                     | 1.02(1.01,1.02)                                            | 1.01(1.00,1.02)                       |
| Age Squared                                           |                     | 1.000(1.000,1.000)                        | 1.000(1.000,1.000)                                  | 1.000(1.000,1.000)                                         | 1.000(1.000,1.000)                    |
| Gender (Female)                                       | Male                | 1.01(1.00,1.02)                           | 1.001(0.991,1.012)                                  | 1.01(1.00,1.02)                                            | 1.02(0.98,1.05)                       |
| Ethnicity (White)                                     | asian, inc. chinese | 0.998(0.968,1.029)                        | 0.98(0.95,1.01)                                     | 0.999(0.963,1.037)                                         | 0.998(0.913,1.090)                    |
|                                                       | black               | 1.08(1.04,1.13)                           | 1.09(1.05,1.13)                                     | 1.06(1.01,1.11)                                            | 1.09(1.00,1.19)                       |
|                                                       | mixed               | 1.11(1.01,1.21)                           | 1.10(1.01,1.20)                                     | 1.17(1.05,1.30)                                            | 1.002(0.812,1.235)                    |
|                                                       | not known           | 0.995(0.971,1.019)                        | 0.99(0.97,1.02)                                     | 1.005(0.977,1.034)                                         | 0.98(0.92,1.05)                       |
|                                                       | other               | 1.01(0.97,1.06)                           | 0.99(0.95,1.04)                                     | 1.02(0.97,1.07)                                            | 1.05(0.94,1.17)                       |

|                                                 |                  |                        |                    |                    |                    |
|-------------------------------------------------|------------------|------------------------|--------------------|--------------------|--------------------|
| Social Deprivation Highest to Lowest (1)        | 2                | 0.99(0.98,1.01)        | 0.996(0.981,1.012) | 1.001(0.983,1.020) | 0.996(0.949,1.045) |
|                                                 | 3                | 0.98(0.97,1.00)        | 0.99(0.97,1.00)    | 0.99(0.97,1.01)    | 1.003(0.952,1.057) |
|                                                 | 4                | 0.99(0.97,1.00)        | 0.99(0.97,1.01)    | 1.002(0.981,1.022) | 1.03(0.97,1.08)    |
|                                                 | Missing          | 0.94(0.91,0.98)        | 0.93(0.90,0.97)    | 0.93(0.89,0.98)    | 0.90(0.81,1.00)    |
| Congestive Heart Failure                        | Yes              | 0.98(0.96,1.00)        | 0.98(0.96,1.00)    | 0.98(0.96,1.01)    | 0.999(0.933,1.071) |
| Hypertension                                    | Yes              | 1.02(1.01,1.03)        | 1.02(1.01,1.03)    | 1.03(1.01,1.04)    | 1.04(1.00,1.07)    |
| Atrial Fibrillation                             | Yes              | 1.02(1.00,1.03)        | 1.01(1.00,1.02)    | 1.008(0.993,1.023) | 1.02(0.98,1.06)    |
| Diabetes                                        | Yes              | 1.03(1.02,1.04)        | 1.03(1.02,1.04)    | 0.99(0.98,1.01)    | 1.04(1.00,1.08)    |
| Previous Stroke/TIA?                            | Yes              | 0.98(0.97,0.99)        | 0.98(0.97,0.99)    | 0.98(0.97,1.00)    | 0.97(0.93,1.01)    |
| Disability at transfer from previous team (mRS) | 1                | 0.68(0.60,0.78)        | 0.68(0.60,0.77)    | 0.69(0.59,0.81)    | 0.76(0.56,1.05)    |
|                                                 | 2                | 0.86(0.77,0.96)        | 0.89(0.80,0.99)    | 0.94(0.83,1.08)    | 1.001(0.765,1.309) |
|                                                 | 3                | 0.99(0.88,1.11)        | 1.02(0.91,1.13)    | 1.04(0.92,1.19)    | 1.13(0.87,1.48)    |
|                                                 | 4                | 1.14(1.02,1.28)        | 1.18(1.06,1.31)    | 1.15(1.01,1.31)    | 1.25(0.96,1.62)    |
|                                                 | 5                | 1.33(1.18,1.49)        | 1.34(1.20,1.49)    | 1.31(1.15,1.49)    | 1.40(1.08,1.83)    |
| Pre-morbid disability (mRS, 0)                  | 1                | 1.05(1.04,1.07)        | 1.05(1.03,1.06)    | 1.01(1.00,1.03)    | 1.05(1.00,1.10)    |
|                                                 | 2                | 1.08(1.06,1.10)        | 1.06(1.04,1.08)    | 1.03(1.01,1.06)    | 0.99(0.94,1.05)    |
|                                                 | 3                | 1.08(1.07,1.10)        | 1.04(1.02,1.06)    | 1.009(0.989,1.030) | 1.04(0.99,1.10)    |
|                                                 | 4                | 1.01(0.99,1.04)        | 0.97(0.95,0.99)    | 0.94(0.92,0.96)    | 1.05(0.97,1.14)    |
|                                                 | 5                | 0.93(0.89,0.97)        | 0.87(0.84,0.91)    | 0.84(0.81,0.88)    | 0.85(0.70,1.03)    |
| Stroke Type (Infarction)                        | Haemorrhage      | 1.21(1.19,1.23)        | 1.20(1.18,1.22)    | 1.13(1.11,1.15)    | 1.08(1.03,1.13)    |
| Stroke Severity (NIHSS, Mild)                   | Moderate(5-14)   | 1.27(1.23,1.32)        | 1.26(1.22,1.30)    | 1.23(1.18,1.29)    | 1.17(1.08,1.26)    |
|                                                 | Severe(15-20)    | 1.44(1.38,1.51)        | 1.40(1.34,1.46)    | 1.42(1.35,1.49)    | 1.33(1.21,1.46)    |
|                                                 | Very Severe(>20) | 1.34(1.28,1.41)        | 1.32(1.26,1.38)    | 1.36(1.29,1.43)    | 1.27(1.14,1.42)    |
| Stroke Impairment Categories (Motor Only)       | Loss-Con         | <b>0.93(0.90,0.96)</b> | 0.92(0.89,0.95)    | 0.96(0.93,1.00)    | 1.09(0.98,1.20)    |
|                                                 | Mo-Co-Se         | 1.03(1.01,1.05)        | 1.02(1.00,1.04)    | 1.04(1.02,1.07)    | 1.06(1.01,1.13)    |
|                                                 | Mo-Co            | 0.998(0.981,1.016)     | 0.98(0.97,1.00)    | 1.009(0.987,1.031) | 1.04(0.99,1.10)    |
|                                                 | Mo-Se            | 0.94(0.92,0.96)        | 0.94(0.93,0.96)    | 0.98(0.95,1.01)    | 0.98(0.92,1.04)    |
|                                                 | No-Mo            | 0.90(0.88,0.92)        | 0.90(0.88,0.92)    | 0.92(0.89,0.95)    | 0.93(0.86,1.00)    |
|                                                 | None             | 0.998(0.973,1.024)     | 0.97(0.95,1.00)    | 1.15(1.11,1.20)    | 1.09(0.99,1.19)    |
| <b>Organisation- related factors</b>            |                  |                        |                    |                    |                    |

|                                          |              |                    |                    |                 |                 |
|------------------------------------------|--------------|--------------------|--------------------|-----------------|-----------------|
| 72hr Swallow assess (No)                 | Yes          | 1.16(1.14,1.18)    | 1.07(1.05,1.09)    | 1.23(1.20,1.25) | 1.13(1.08,1.19) |
| 72hr Clinical Assessment(No)             | Yes          | 0.80(0.78,0.82)    | 0.73(0.72,0.75)    | 0.96(0.94,0.98) | NA              |
| No. any assessments (0-3)                |              | 0.996(0.987,1.005) | 1.05(1.04,1.06)    | 0.92(0.91,0.93) | 0.97(0.95,0.99) |
| Thrombolysis available (24hrs day)       | Non-24hrs/UA | 1.13(0.97,1.32)    | 1.11(0.95,1.30)    | 1.09(0.93,1.29) | 1.23(0.97,1.55) |
| Ward Round 7d per wk                     | Yes          | 1.04(0.94,1.15)    | 1.06(0.95,1.17)    | 1.04(0.93,1.16) | 1.04(0.89,1.21) |
| Median Length of stay in Unit            |              | 1.03(1.02,1.04)    | 1.03(1.02,1.04)    | 1.03(1.02,1.04) | 1.02(1.00,1.03) |
| Team Type (RATa)                         | RATc         | 1.12(1.05,1.18)    | 1.11(1.05,1.17)    | 1.12(1.05,1.19) | 1.29(1.15,1.45) |
|                                          | NRAT         | 0.90(0.75,1.08)    | 0.92(0.76,1.11)    | 0.98(0.80,1.20) | 1.08(0.82,1.43) |
|                                          | NAIT         | 0.84(0.49,1.46)    | 0.999(0.571,1.747) | 1.15(0.64,2.07) | 0.75(0.33,1.70) |
| Qualified Nurses (WTE/ 10bds)            |              | 0.97(0.96,0.99)    | 0.97(0.95,0.99)    | 0.98(0.96,0.99) | 0.99(0.97,1.01) |
| Nurse support workers (WTE/ 10bds)       |              | 1.05(1.02,1.07)    | 1.05(1.02,1.07)    | 1.05(1.02,1.08) | 1.07(1.03,1.11) |
| Qualified Therapists (WTE/ 10bds)        |              | 0.97(0.87,1.08)    | 1.06(0.96,1.17)    | 0.95(0.80,1.13) | 0.91(0.67,1.23) |
| Therapy support worker (WTE/ 10bds)      |              | 1.12(0.95,1.33)    | 1.10(0.97,1.25)    | 1.17(0.89,1.54) | 1.37(0.65,2.86) |
| No. Therapies available 6/7 days/ wk (0) | 1            | 1.08(0.94,1.24)    | 1.08(0.95,1.24)    | 1.10(0.95,1.27) | 1.06(0.87,1.29) |
|                                          | 2 or more    | 0.98(0.89,1.08)    | 0.99(0.90,1.10)    | 0.99(0.90,1.10) | 1.16(1.00,1.34) |
| Access to Social Wk in 5days (Yes)       | No           | 0.93(0.71,1.21)    | 0.98(0.75,1.28)    | 0.94(0.71,1.24) | 0.88(0.59,1.32) |
| Access to ESD Team                       | Non-spec ESD | 0.98(0.83,1.16)    | 1.02(0.86,1.21)    | 1.02(0.85,1.22) | 0.87(0.70,1.07) |
|                                          | None         | 1.07(0.95,1.21)    | 1.06(0.94,1.19)    | 1.09(0.96,1.23) | 0.95(0.79,1.14) |
| Access to CRT                            | Yes          | 0.99(0.90,1.08)    | 0.97(0.89,1.07)    | 0.98(0.88,1.08) | 0.92(0.80,1.06) |
| Constant                                 | Cut Point 1  | 8.1(5.8,11.3)      | 8.6(6.3,11.8)      | 9.5(6.8,13.4)   | 10.2(5.7,18.4)  |
|                                          | ln(Alpha)    | -0.53              | -0.56              | -0.63           | -1.07           |
| Team                                     | Var(Cons)    | 0.08               | 0.09               | 0.09            | 0.1             |

SIC = NIHSS defined Stroke Impairment Category, Loss-Con = Any Loss of Consciousness, Motor = Motor only impairments (most common group), Mo-Co-Se = Motor + Cognitive + Sensory impairments, Mo-Co = Motor + Cognitive Impairments only, Mo-Se = Motor + Sensory Impairments only, No-Mo = Any other Non-motor impairment combination, mRS = modified Rankin Score, RATa = SSNAP defined Routinely Admitting Team with median length of stay <7days (i.e. approx acute care team), RATc = SSNAP defined RAT with median LOS>7days (i.e. approx. acute & rehab team), NRAT = SSNAP defined Non-RAT (i.e. inpatient team), NAIT = SSNAP Non Acute Inpatient Team (i.e. a rehab inpatient team), ESD = Early Support Discharge Team, CRT = Community Rehab team, WTE = Whole Time Equivalent, and NA = Not available or model dropped due to perfect prediction/collinearity.

**Supplementary Table 3:** The factors associated with Home destination at discharge from inpatient stroke care hospital for Physiotherapy, Occupational Therapy, Speech and Language Therapy and Psychology – As produced from the single fully adjusted multilevel mixed effects ordinal logistic regression model.

| Destination on Discharge (home)          |                                    | Physiotherapy<br>N=96,537<br>OR(95% C.I.) | Occupational<br>Therapy<br>n-92,542<br>OR(95% C.I.) | Speech and Language<br>Therapy<br>N=61,206<br>OR(95% C.I.) | Psychology<br>N=6,074<br>OR(95% C.I.) |                 |
|------------------------------------------|------------------------------------|-------------------------------------------|-----------------------------------------------------|------------------------------------------------------------|---------------------------------------|-----------------|
| Average Min Therapy per Day of Stay      |                                    | 0.985(0.984,0.986)                        | 1.015(1.013,1.017)                                  | 1.004(1.002,1.007)                                         | 1.026(1.011,1.041)                    |                 |
| <b>Admission related factors</b>         |                                    |                                           |                                                     |                                                            |                                       |                 |
| Team Count                               |                                    | 1.19(1.07,1.32)                           | 1.10(0.99,1.22)                                     | 1.12(0.98,1.27)                                            | 1.18(0.88,1.59)                       |                 |
| Time from Entry                          |                                    | 0.98(0.98,0.99)                           | 0.98(0.98,0.99)                                     | 0.98(0.98,0.99)                                            | 0.999(0.982,1.016)                    |                 |
| Day of Entry (Mon)                       | Tuesday                            | 0.99(0.93,1.05)                           | 0.997(0.941,1.056)                                  | 0.99(0.92,1.07)                                            | 1.20(0.96,1.50)                       |                 |
|                                          | Wednesday                          | 0.94(0.89,1.00)                           | 0.97(0.91,1.02)                                     | 0.98(0.91,1.05)                                            | 1.09(0.87,1.36)                       |                 |
|                                          | Thursday                           | 1.11(1.05,1.18)                           | 1.15(1.09,1.22)                                     | 1.13(1.05,1.21)                                            | 1.03(0.82,1.30)                       |                 |
|                                          | Friday                             | 1.16(1.09,1.22)                           | 1.20(1.13,1.27)                                     | 1.16(1.08,1.25)                                            | 1.07(0.86,1.34)                       |                 |
|                                          | Saturday                           | 0.997(0.940,1.058)                        | 1.02(0.96,1.08)                                     | 0.98(0.91,1.06)                                            | 0.98(0.77,1.24)                       |                 |
|                                          | Sunday                             | 0.96(0.90,1.02)                           | 0.95(0.90,1.01)                                     | 0.96(0.89,1.04)                                            | 1.09(0.86,1.37)                       |                 |
|                                          | Time from entry to 1st Stroke Unit | 1.000(0.999,1.000)                        | 1.000(0.999,1.000)                                  | 1.000(1.000,1.001)                                         | 0.999(0.998,1.000)                    |                 |
| Time of Entry(00.00-07.59)               | 08:00+                             | 1.15(1.10,1.22)                           | 1.19(1.13,1.25)                                     | 1.11(1.04,1.18)                                            | 1.01(0.84,1.22)                       |                 |
|                                          | 16:00+                             | 1.08(1.02,1.14)                           | 1.09(1.03,1.15)                                     | 1.02(0.95,1.09)                                            | 0.83(0.68,1.01)                       |                 |
| <b>Patient-related factors</b>           |                                    |                                           |                                                     |                                                            |                                       |                 |
| Age                                      |                                    | 1.06(1.05,1.07)                           | 1.05(1.04,1.06)                                     | 1.07(1.06,1.08)                                            | 1.04(1.01,1.07)                       |                 |
| Age Squared                              |                                    | 0.999(0.999,0.999)                        | 0.999(0.999,1.000)                                  | 0.999(0.999,0.999)                                         | 1.000(0.999,1.000)                    |                 |
| Gender (Female)                          | Male                               | 0.97(0.94,1.00)                           | 0.97(0.94,1.00)                                     | 0.95(0.92,0.99)                                            | 0.89(0.78,1.01)                       |                 |
|                                          | Ethnicity (White)                  | asian, inc. chinese                       | 1.42(1.29,1.57)                                     | 1.42(1.29,1.56)                                            | 1.58(1.40,1.79)                       | 1.51(1.09,2.08) |
|                                          |                                    | black                                     | 1.02(0.89,1.16)                                     | 1.02(0.89,1.16)                                            | 1.14(0.98,1.34)                       | 1.14(0.82,1.58) |
|                                          |                                    | mixed                                     | 0.96(0.73,1.26)                                     | 0.91(0.69,1.20)                                            | 1.19(0.82,1.72)                       | 2.14(1.00,4.59) |
|                                          |                                    | not known                                 | 0.95(0.88,1.02)                                     | 0.94(0.88,1.02)                                            | 0.96(0.88,1.06)                       | 0.92(0.72,1.17) |
|                                          |                                    | other                                     | 1.27(1.10,1.45)                                     | 1.23(1.07,1.41)                                            | 1.29(1.08,1.54)                       | 1.13(0.73,1.73) |
| Social Deprivation Highest to Lowest (1) | 2                                  | 1.02(0.98,1.07)                           | 1.02(0.98,1.07)                                     | 0.99(0.93,1.05)                                            | 1.03(0.86,1.25)                       |                 |

|                                                 |                  |                        |                    |                 |                 |
|-------------------------------------------------|------------------|------------------------|--------------------|-----------------|-----------------|
|                                                 | 3                | 1.006(0.958,1.056)     | 1.01(0.96,1.06)    | 0.99(0.93,1.06) | 1.16(0.95,1.42) |
|                                                 | 4                | 1.07(1.01,1.12)        | 1.05(1.00,1.11)    | 1.05(0.98,1.12) | 1.15(0.94,1.43) |
|                                                 | Missing          | 1.31(1.17,1.47)        | 1.35(1.21,1.51)    | 1.22(1.05,1.41) | 1.28(0.86,1.92) |
| Congestive Heart Failure                        | Yes              | 0.96(0.90,1.03)        | 0.99(0.92,1.06)    | 0.93(0.85,1.01) | 1.03(0.78,1.36) |
| Hypertension                                    | Yes              | 1.04(1.01,1.08)        | 1.04(1.00,1.07)    | 1.04(1.00,1.09) | 0.98(0.86,1.12) |
| Atrial Fibrillation                             | Yes              | 0.97(0.93,1.01)        | 1.001(0.962,1.042) | 0.98(0.94,1.03) | 0.92(0.78,1.08) |
| Diabetes                                        | Yes              | 0.95(0.91,0.99)        | 0.96(0.93,1.00)    | 0.97(0.92,1.02) | 0.95(0.81,1.11) |
| Previous Stroke/TIA?                            | Yes              | 1.12(1.08,1.16)        | 1.12(1.08,1.16)    | 1.10(1.05,1.16) | 1.02(0.88,1.18) |
| Disability at transfer from previous team (mRS) | 1                | 1.21(0.84,1.77)        | 1.14(0.79,1.65)    | 1.37(0.86,2.16) | 0.85(0.25,2.91) |
|                                                 | 2                | 1.13(0.82,1.56)        | 1.07(0.78,1.47)    | 1.14(0.78,1.68) | 0.95(0.33,2.72) |
|                                                 | 3                | 0.78(0.56,1.07)        | 0.72(0.53,0.99)    | 0.83(0.57,1.22) | 0.55(0.20,1.54) |
|                                                 | 4                | 0.57(0.41,0.78)        | 0.54(0.39,0.73)    | 0.59(0.40,0.86) | 0.46(0.17,1.28) |
|                                                 | 5                | 0.38(0.27,0.52)        | 0.38(0.28,0.53)    | 0.45(0.30,0.66) | 0.27(0.10,0.78) |
| Pre-morbid disability (mRS, 0)                  | 1                | 0.86(0.82,0.90)        | 0.88(0.84,0.92)    | 0.88(0.83,0.93) | 0.81(0.68,0.96) |
|                                                 | 2                | 0.72(0.69,0.76)        | 0.76(0.72,0.80)    | 0.75(0.70,0.80) | 0.80(0.65,0.98) |
|                                                 | 3                | 0.61(0.57,0.64)        | 0.68(0.64,0.72)    | 0.64(0.59,0.68) | 0.61(0.49,0.77) |
|                                                 | 4                | 0.51(0.48,0.55)        | 0.59(0.55,0.64)    | 0.60(0.54,0.65) | 0.72(0.52,0.99) |
|                                                 | 5                | 0.48(0.41,0.56)        | 0.61(0.52,0.71)    | 0.64(0.54,0.76) | 1.29(0.62,2.67) |
| Stroke Type (Infarction)                        | Haemorrhage      | 0.64(0.61,0.68)        | 0.65(0.62,0.69)    | 0.66(0.62,0.71) | 0.80(0.67,0.96) |
| Stroke Severity (NIHSS, Mild)                   | Moderate(5-14)   | 0.70(0.64,0.78)        | 0.72(0.65,0.80)    | 0.67(0.59,0.76) | 0.95(0.72,1.26) |
|                                                 | Severe(15-20)    | 0.45(0.39,0.51)        | 0.49(0.43,0.55)    | 0.47(0.40,0.55) | 0.63(0.43,0.92) |
|                                                 | Very Severe(>20) | 0.42(0.35,0.49)        | 0.45(0.39,0.53)    | 0.42(0.35,0.51) | 0.70(0.45,1.09) |
| Stroke Impairment Categories (Motor Only)       | Loss-Con         | <b>0.88(0.78,0.98)</b> | 1.009(0.901,1.130) | 0.97(0.85,1.10) | 1.06(0.69,1.62) |
|                                                 | Mo-Co-Se         | 0.94(0.89,0.99)        | 0.99(0.93,1.04)    | 0.98(0.91,1.05) | 1.04(0.84,1.29) |
|                                                 | Mo-Co            | 0.97(0.92,1.02)        | 1.06(1.01,1.12)    | 1.10(1.03,1.18) | 1.12(0.90,1.38) |
|                                                 | Mo-Se            | 1.13(1.06,1.19)        | 1.11(1.05,1.18)    | 1.07(0.98,1.17) | 1.18(0.94,1.48) |
|                                                 | No-Mo            | 1.12(1.05,1.19)        | 1.23(1.16,1.31)    | 1.17(1.07,1.28) | 1.22(0.94,1.59) |
|                                                 | None             | 1.11(1.03,1.19)        | 1.25(1.16,1.34)    | 0.89(0.79,0.99) | 1.26(0.91,1.74) |
| <b>Organisation- related factors</b>            |                  |                        |                    |                 |                 |
| 72hr Swallow assess (No)                        | Yes              | 0.77(0.73,0.80)        | 0.88(0.83,0.93)    | 0.67(0.63,0.72) | 0.82(0.69,0.97) |



|                                          |              |                    |                    |                 |                  |
|------------------------------------------|--------------|--------------------|--------------------|-----------------|------------------|
| 72hr Clinical Assessment(No)             | Yes          | 1.21(1.12,1.31)    | 1.24(1.16,1.32)    | 1.16(1.08,1.24) | NA               |
| No. any assessments (0-3)                |              | 1.003(0.975,1.032) | 0.91(0.88,0.94)    | 1.10(1.06,1.15) | 1.01(0.93,1.10)  |
| Thrombolysis available (24hrs day)       | Non-24hrs/UA | 0.68(0.44,1.06)    | 0.67(0.42,1.06)    | 0.72(0.45,1.14) | 0.51(0.24,1.09)  |
| Ward Round 7d per wk                     | Yes          | 1.29(0.96,1.73)    | 1.32(0.97,1.80)    | 1.37(1.01,1.86) | 1.49(0.92,2.41)  |
| Median Length of stay in Unit            |              | 1.03(1.00,1.06)    | 1.04(1.01,1.07)    | 1.03(1.00,1.06) | 1.02(0.98,1.07)  |
| Team Type (RATa)                         | RATc         | 0.99(0.83,1.17)    | 1.007(0.848,1.198) | 1.12(0.92,1.37) | 1.27(0.85,1.89)  |
|                                          | NRAT         | 0.97(0.57,1.65)    | 0.86(0.49,1.50)    | 1.02(0.57,1.80) | 1.16(0.46,2.92)  |
|                                          | NAIT         | 0.27(0.06,1.31)    | 0.16(0.03,0.84)    | 0.29(0.06,1.52) | 0.98(0.91,1.06)  |
| Qualified Nurses (WTE/ 10bds)            |              | 0.98(0.93,1.03)    | 0.98(0.93,1.03)    | 0.97(0.92,1.02) | 0.97(0.87,1.09)  |
| Nurse support workers (WTE/ 10bds)       |              | 1.02(0.95,1.08)    | 1.02(0.95,1.09)    | 1.03(0.96,1.10) | 1.41(0.54,3.72)  |
| Qualified Therapists (WTE/ 10bds)        |              | 0.69(0.51,0.94)    | 0.66(0.49,0.89)    | 0.76(0.47,1.22) | 1.19(0.12,12.00) |
| Therapy support worker (WTE/ 10bds)      |              | 2.32(1.44,3.76)    | 1.37(0.94,1.99)    | 1.52(0.70,3.27) | NA               |
| No. Therapies available 6/7 days/ wk (0) | 1            | 1.14(0.77,1.69)    | 1.14(0.76,1.71)    | 1.16(0.77,1.74) | 1.04(0.56,1.94)  |
|                                          | 2 or more    | 1.01(0.76,1.34)    | 0.94(0.70,1.27)    | 1.01(0.76,1.35) | 1.15(0.72,1.84)  |
| Access to Social Wk in 5days (Yes)       | No           | 0.64(0.30,1.37)    | 0.62(0.28,1.37)    | 0.65(0.30,1.42) | 0.51(0.14,1.78)  |
| Access to ESD Team                       | Non-spec ESD | 1.48(0.91,2.39)    | 1.54(0.93,2.53)    | 1.58(0.96,2.59) | 2.04(1.03,4.02)  |
|                                          | None         | 2.07(1.48,2.91)    | 2.13(1.49,3.05)    | 2.07(1.45,2.95) | 3.0(1.7,5.5)     |
| Access to CRT                            | Yes          | 0.87(0.66,1.14)    | 0.85(0.64,1.13)    | 0.88(0.66,1.16) | 0.76(0.48,1.18)  |
| Constant                                 |              | 0.57(0.22,1.46)    | 0.54(0.21,1.39)    | 0.19(0.07,0.51) | 0.57(0.07,4.46)  |
| Team                                     | Var(Cons)    | 0.66               | 0.73               | 0.7             | 0.85             |

SIC = NIHSS defined Stroke Impairment Category, Loss-Con = Any Loss of Consciousness, Motor = Motor only impairments (most common group), Mo-Co-Se = Motor + Cognitive + Sensory impairments, Mo-Co = Motor + Cognitive Impairments only, Mo-Se = Motor + Sensory Impairments only, No-Mo = Any other Non-motor impairment combination, mRS = modified Rankin Score, RATa = SSNAP defined Routinely Admitting Team with median length of stay <7days (i.e. approx acute care team), RATc = SSNAP defined RAT with median LOS>7days (i.e. approx. acute & rehab team), NRAT = SSNAP defined Non-RAT (i.e. inpatient team), NAIT = SSNAP Non Acute Inpatient Team (i.e. a rehab inpatient team), ESD = Early Support Discharge Team, CRT = Community Rehab team, WTE = Whole Time Equivalent, and NA = Not available or model dropped due to perfect prediction/collinearity.

**Supplementary Table 4:** The factors associated with Mortality at discharge from inpatient stroke care hospital for Physiotherapy, Occupational Therapy, Speech and Language Therapy and Psychology – As produced from the single fully adjusted multilevel mixed effects ordinal logistic regression model.

| Mortality /Model Covariates (Ref cat) |                                    | Physiotherapy<br>N=96,537<br>OR(95% C.I.) | Occupational<br>Therapy<br>N=92,542<br>OR(95% C.I.) | Speech and Language<br>Therapy<br>N=61,206<br>OR(95% C.I.) | Psychology<br>N=6,074<br>OR(95% C.I.) |
|---------------------------------------|------------------------------------|-------------------------------------------|-----------------------------------------------------|------------------------------------------------------------|---------------------------------------|
| Average Min Therapy per Day of Stay   |                                    | 0.975(0.972,0.978)                        | 0.883(0.879,0.887)                                  | 0.945(0.940,0.950)                                         | 0.843(0.786,0.904)                    |
| <b>Admission related factors</b>      |                                    |                                           |                                                     |                                                            |                                       |
| Team Count                            |                                    | 0.78(0.68,0.90)                           | 0.89(0.76,1.04)                                     | 0.85(0.73,0.99)                                            | 1.19(0.72,1.97)                       |
| Time from Entry                       |                                    | 0.99(0.98,1.00)                           | 0.99(0.98,1.00)                                     | 0.99(0.98,1.00)                                            | 0.98(0.94,1.01)                       |
| Day of Entry (Mon)                    | Tuesday                            | 0.92(0.85,1.00)                           | 0.97(0.88,1.06)                                     | 0.93(0.85,1.03)                                            | 0.78(0.50,1.23)                       |
|                                       | Wednesday                          | 0.98(0.90,1.06)                           | 0.99(0.90,1.08)                                     | 0.95(0.87,1.05)                                            | 0.70(0.44,1.12)                       |
|                                       | Thursday                           | 0.91(0.84,0.99)                           | 0.93(0.85,1.03)                                     | 0.89(0.81,0.98)                                            | 1.02(0.66,1.57)                       |
|                                       | Friday                             | 0.77(0.71,0.84)                           | 0.82(0.74,0.90)                                     | 0.78(0.70,0.85)                                            | 0.72(0.45,1.16)                       |
|                                       | Saturday                           | 0.90(0.83,0.98)                           | 0.93(0.85,1.03)                                     | 0.89(0.81,0.98)                                            | 0.85(0.52,1.37)                       |
|                                       | Sunday                             | 0.98(0.89,1.06)                           | 1.002(0.909,1.104)                                  | 0.96(0.87,1.06)                                            | 0.91(0.57,1.47)                       |
|                                       | Time from entry to 1st Stroke Unit | 1.000(1.000,1.001)                        | 1.000(1.000,1.001)                                  | 1.000(1.000,1.001)                                         | 1.002(1.000,1.004)                    |
| Time of Entry(00.00-07.59)            | 08:00+                             | 0.86(0.80,0.92)                           | 0.83(0.77,0.90)                                     | 0.87(0.80,0.94)                                            | 0.86(0.59,1.25)                       |
|                                       | 16:00+                             | 0.90(0.83,0.97)                           | 0.87(0.80,0.95)                                     | 0.88(0.80,0.96)                                            | 0.87(0.58,1.31)                       |
| <b>Patient-related factors</b>        |                                    |                                           |                                                     |                                                            |                                       |
| Age                                   |                                    | 1.01(0.99,1.03)                           | 1.02(1.00,1.05)                                     | 1.002(0.978,1.026)                                         | 0.99(0.89,1.11)                       |
| Age Squared                           |                                    | 1.000(1.000,1.000)                        | 1.000(1.000,1.000)                                  | 1.000(1.000,1.000)                                         | 1.000(1.000,1.001)                    |
| Gender (Female)<br>Ethnicity (White)  | Male                               | 1.42(1.35,1.49)                           | 1.36(1.28,1.43)                                     | 1.43(1.35,1.51)                                            | 1.50(1.15,1.95)                       |
|                                       | asian, inc.                        | 0.68(0.57,0.80)                           | 0.69(0.57,0.84)                                     | 0.61(0.50,0.75)                                            | 0.49(0.19,1.28)                       |
|                                       | chinese                            |                                           |                                                     |                                                            |                                       |
|                                       | black                              | 0.80(0.64,1.02)                           | 0.86(0.66,1.11)                                     | 0.82(0.64,1.06)                                            | 0.85(0.39,1.86)                       |
|                                       | mixed                              | 1.35(0.88,2.09)                           | 1.27(0.78,2.08)                                     | 1.05(0.60,1.82)                                            | 3.2(0.9,11.7)                         |
|                                       | not known                          | 0.92(0.82,1.03)                           | 0.88(0.77,1.00)                                     | 0.89(0.78,1.01)                                            | 0.81(0.46,1.44)                       |
|                                       | other                              | 0.76(0.60,0.96)                           | 0.77(0.59,1.00)                                     | 0.81(0.62,1.05)                                            | 1.003(0.406,2.477)                    |
|                                       | 2                                  | 0.99(0.93,1.07)                           | 1.01(0.93,1.09)                                     | 0.98(0.91,1.06)                                            | 0.59(0.40,0.87)                       |

|                                                 |                  |                    |                 |                    |                  |
|-------------------------------------------------|------------------|--------------------|-----------------|--------------------|------------------|
| Social Deprivation Highest to Lowest (1)        | 3                | 1.03(0.96,1.10)    | 1.06(0.97,1.14) | 1.006(0.928,1.090) | 0.82(0.57,1.20)  |
|                                                 | 4                | 1.004(0.931,1.082) | 1.02(0.93,1.11) | 1.002(0.920,1.091) | 0.91(0.63,1.32)  |
|                                                 | Missing          | 0.85(0.73,0.99)    | 0.78(0.64,0.94) | 0.78(0.65,0.93)    | 0.28(0.12,0.63)  |
| Congestive Heart Failure                        | Yes              | 1.53(1.41,1.66)    | 1.52(1.39,1.66) | 1.55(1.42,1.70)    | 1.48(0.97,2.26)  |
| Hypertension                                    | Yes              | 0.94(0.90,0.98)    | 0.95(0.91,1.01) | 0.95(0.90,1.00)    | 0.96(0.74,1.24)  |
| Atrial Fibrillation                             | Yes              | 1.37(1.31,1.44)    | 1.36(1.29,1.44) | 1.38(1.30,1.46)    | 1.36(1.03,1.79)  |
| Diabetes                                        | Yes              | 1.21(1.14,1.28)    | 1.16(1.09,1.24) | 1.19(1.12,1.27)    | 1.05(0.77,1.45)  |
| Previous Stroke/TIA?                            | Yes              | 0.90(0.85,0.94)    | 0.88(0.83,0.93) | 0.89(0.84,0.94)    | 1.37(1.04,1.81)  |
| Disability at transfer from previous team (mRS) | 1                | 0.54(0.17,1.75)    | 0.51(0.15,1.68) | 0.31(0.09,1.10)    | 0.59(0.03,10.59) |
|                                                 | 2                | 0.97(0.41,2.30)    | 0.81(0.33,1.98) | 0.92(0.41,2.10)    | 0.41(0.05,3.63)  |
|                                                 | 3                | 1.41(0.60,3.30)    | 1.08(0.45,2.63) | 0.99(0.44,2.21)    | 0.38(0.05,3.11)  |
|                                                 | 4                | 2.21(0.95,5.14)    | 1.56(0.65,3.75) | 1.35(0.60,3.01)    | 0.46(0.06,3.71)  |
|                                                 | 5                | 4.2(1.8,9.9)       | 2.7(1.1,6.5)    | 2.32(1.04,5.18)    | 0.72(0.09,5.87)  |
| Pre-morbid disability (mRS, 0)                  | 1                | 1.34(1.25,1.44)    | 1.27(1.17,1.37) | 1.35(1.24,1.46)    | 1.39(0.96,2.02)  |
|                                                 | 2                | 1.59(1.48,1.72)    | 1.49(1.37,1.62) | 1.60(1.47,1.74)    | 1.70(1.14,2.53)  |
|                                                 | 3                | 1.68(1.57,1.80)    | 1.39(1.29,1.50) | 1.70(1.57,1.84)    | 2.17(1.49,3.14)  |
|                                                 | 4                | 1.65(1.52,1.80)    | 1.25(1.13,1.37) | 1.70(1.55,1.87)    | 1.31(0.75,2.28)  |
|                                                 | 5                | 1.28(1.11,1.47)    | 0.90(0.77,1.06) | 1.29(1.10,1.50)    | 1.36(0.43,4.36)  |
| Stroke Type (Infarction)                        | Haemorrhage      | 1.45(1.36,1.55)    | 1.29(1.19,1.40) | 1.25(1.15,1.35)    | 0.93(0.64,1.35)  |
| Stroke Severity (NIHSS, Mild)                   | Moderate(5-14)   | 1.92(1.55,2.38)    | 1.76(1.39,2.23) | 1.85(1.47,2.35)    | 1.78(0.88,3.62)  |
|                                                 | Severe(15-20)    | 3.0(2.4,3.8)       | 2.32(1.80,2.99) | 2.7(2.1,3.5)       | 1.47(0.64,3.37)  |
|                                                 | Very Severe(>20) | 2.6(2.0,3.3)       | 1.91(1.45,2.51) | 2.35(1.79,3.08)    | 1.59(0.67,3.81)  |
| Stroke Impairment Categories (Motor Only)       | Loss-Con         |                    | 1.58(1.37,1.81) | 1.42(1.23,1.64)    | 1.97(0.98,3.99)  |
|                                                 | Mo-Co-Se         | 1.22(1.10,1.34)    | 1.16(1.04,1.30) | 1.13(1.01,1.27)    | 1.41(0.85,2.33)  |
|                                                 | Mo-Co            | 1.17(1.06,1.29)    | 1.02(0.92,1.14) | 1.04(0.93,1.16)    | 1.12(0.67,1.87)  |
|                                                 | Mo-Se            | 0.86(0.75,0.97)    | 0.89(0.77,1.02) | 0.88(0.75,1.03)    | 0.95(0.51,1.77)  |
|                                                 | No-Mo            | 0.86(0.75,1.00)    | 0.80(0.68,0.94) | 0.78(0.65,0.93)    | 1.30(0.67,2.54)  |
|                                                 | None             | 1.88(1.66,2.14)    | 1.55(1.34,1.79) | 1.92(1.64,2.24)    | 0.99(0.45,2.20)  |
| <b>Organisation- related factors</b>            |                  |                    |                 |                    |                  |

|                                          |              |                    |                    |                    |                    |
|------------------------------------------|--------------|--------------------|--------------------|--------------------|--------------------|
| 72hr Swallow assess (No)                 | Yes          | 1.59(1.47,1.71)    | 1.19(1.08,1.30)    | 1.74(1.60,1.89)    | 1.54(1.06,2.25)    |
| 72hr Clinical Assessment(No)             | Yes          | 1.43(1.29,1.60)    | 1.15(1.04,1.29)    | 1.16(1.06,1.26)    |                    |
| No. any assessments (0-3)                |              | 0.97(0.97,0.98)    | 0.88(0.88,0.89)    | 0.94(0.94,0.95)    | 0.84(0.79,0.91)    |
| Thrombolysis available (24hrs day)       | Non-24hrs/UA | 0.92(0.73,1.15)    | 0.81(0.60,1.09)    | 0.79(0.63,1.00)    | 1.58(0.88,2.82)    |
| Ward Round 7d per wk                     | Yes          | 0.91(0.79,1.05)    | 0.93(0.76,1.12)    | 0.86(0.74,1.00)    | 0.71(0.50,1.01)    |
| Median Length of stay in Unit            |              | 1.02(1.01,1.04)    | 1.02(0.99,1.04)    | 1.02(1.01,1.04)    | 1.03(1.00,1.06)    |
| Team Type (RATa)                         | RATc         | 1.05(0.92,1.20)    | 0.95(0.80,1.14)    | 1.03(0.89,1.18)    | 1.04(0.69,1.58)    |
|                                          | NRAT         | 0.92(0.66,1.26)    | 1.03(0.68,1.56)    | 0.95(0.68,1.33)    | 0.70(0.32,1.54)    |
|                                          | NAIT         | 0.11(0.03,0.38)    | 0.26(0.06,1.12)    | 0.12(0.03,0.41)    | 0.998(0.942,1.058) |
| Qualified Nurses (WTE/ 10bds)            |              | 0.96(0.94,0.98)    | 0.97(0.94,1.00)    | 0.96(0.94,0.98)    | 1.02(0.94,1.11)    |
| Nurse support workers (WTE/ 10bds)       |              | 1.04(1.01,1.08)    | 1.03(0.99,1.08)    | 1.05(1.01,1.08)    | 0.62(0.33,1.17)    |
| Qualified Therapists (WTE/ 10bds)        |              | 0.97(0.84,1.13)    | 1.54(1.27,1.87)    | 1.02(0.81,1.28)    | 1.62(0.34,7.76)    |
| Therapy support worker (WTE/ 10bds)      |              | 1.30(1.03,1.65)    | 1.20(0.95,1.52)    | 1.37(0.95,1.99)    | NA                 |
| No. Therapies available 6/7 days/ wk (0) | 1            | 1.12(0.92,1.36)    | 1.04(0.80,1.34)    | 1.12(0.92,1.37)    | 1.23(0.77,1.95)    |
|                                          | 2 or more    | 0.98(0.85,1.12)    | 1.04(0.86,1.25)    | 0.99(0.86,1.14)    | 0.83(0.58,1.18)    |
| Access to Social Wk in 5days (Yes)       | No           | 0.82(0.57,1.17)    | 0.84(0.51,1.37)    | 0.83(0.57,1.19)    | 1.66(0.83,3.31)    |
| Access to ESD Team                       | Non-spec ESD | 0.96(0.75,1.22)    | 1.02(0.74,1.41)    | 1.08(0.85,1.38)    | 1.84(1.12,3.01)    |
|                                          | None         | 1.01(0.85,1.20)    | 0.99(0.79,1.25)    | 0.97(0.81,1.15)    | 0.99(0.59,1.67)    |
| Access to CRT                            | Yes          | 0.96(0.84,1.10)    | 1.04(0.87,1.24)    | 1.006(0.879,1.151) | 0.56(0.40,0.80)    |
| Constant                                 |              | 0.004(0.001,0.015) | 0.006(0.002,0.026) | 0.01(0.00,0.05)    | 0.01(0.00,1.15)    |
| Team                                     | Var(Cons)    | 0.13               | 0.25               | 0.13               | 0.06               |

SIC = NIHSS defined Stroke Impairment Category, Loss-Con = Any Loss of Consciousness, Motor = Motor only impairments (most common group), Mo-Co-Se = Motor + Cognitive + Sensory impairments, Mo-Co = Motor + Cognitive Impairments only, Mo-Se = Motor + Sensory Impairments only, No-Mo – Any other Non-motor impairment combination, mRS = modified Rankin Score, RATa = SSNAP defined Routinely Admitting Team with median length of stay <7days (i.e. approx acute care team), RATc = SSNAP defined RAT with median LOS>7days (i.e. approx. acute & rehab team), NRAT = SSNAP defined Non-RAT (i.e. inpatient team), NAIT = SSNAP Non Acute Inpatient Team (i.e. a rehab inpatient team), ESD = Early Support Discharge Team, CRT = Community Rehab team, WTE = Whole Time Equivalent, and NA = Not available or model dropped due to perfect prediction/collinearity.

**Supplementary Figure 1.** Cubic Splines Plot of the rate Ratio (95% CI) of length of stay per minute of Therapy/ inpatient day of stay (referenced to zero) - As produced from the full adjusted multilevel mixed effects ordinal logistic regression model.

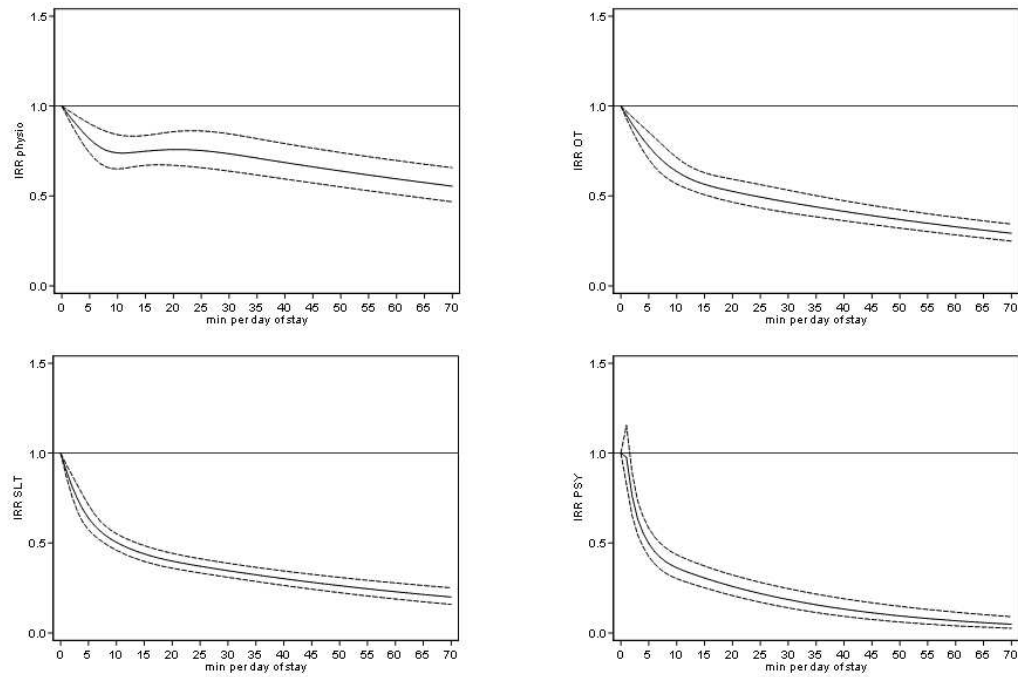

**Supplementary Figure 2.** Cubic Splines Plot of the Odds Ratio (95% CI) for Home on discharge per minute of therapy / inpatient day of stay (referenced to zero) – As produced from the fully adjusted multilevel mixed effects regression model

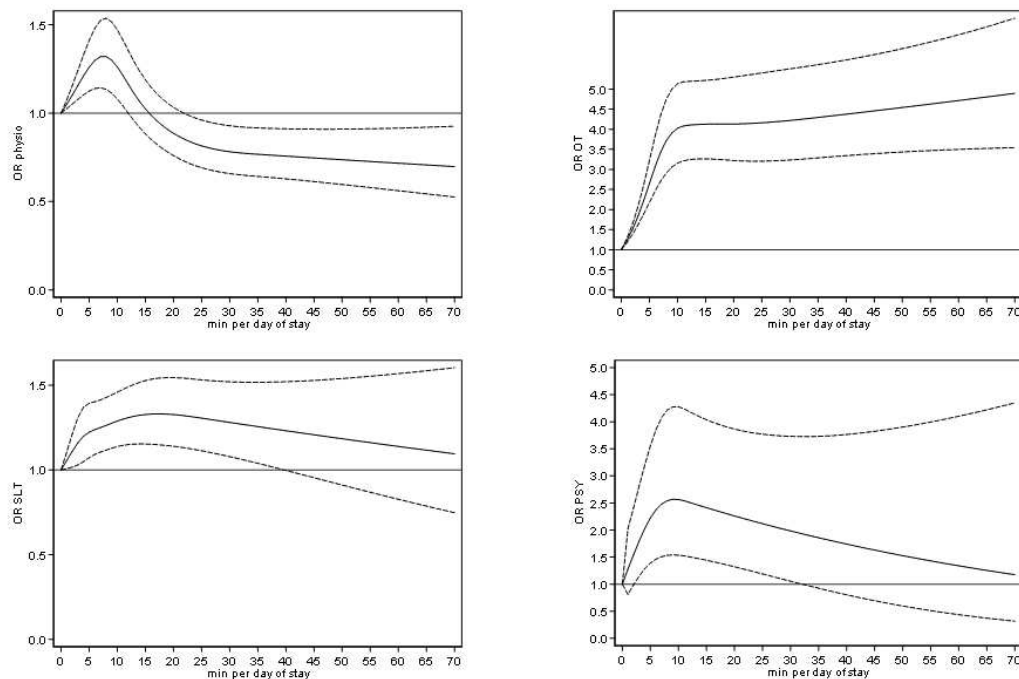

□

**Supplementary Figure 3.** Cubic Spline Plot of the Odds Ratio (95% CI) for death on discharge per min of therapy/ inpatient day of stay (referenced to zero) - As produced from the fully adjusted multilevel mixed effects ordinal regression

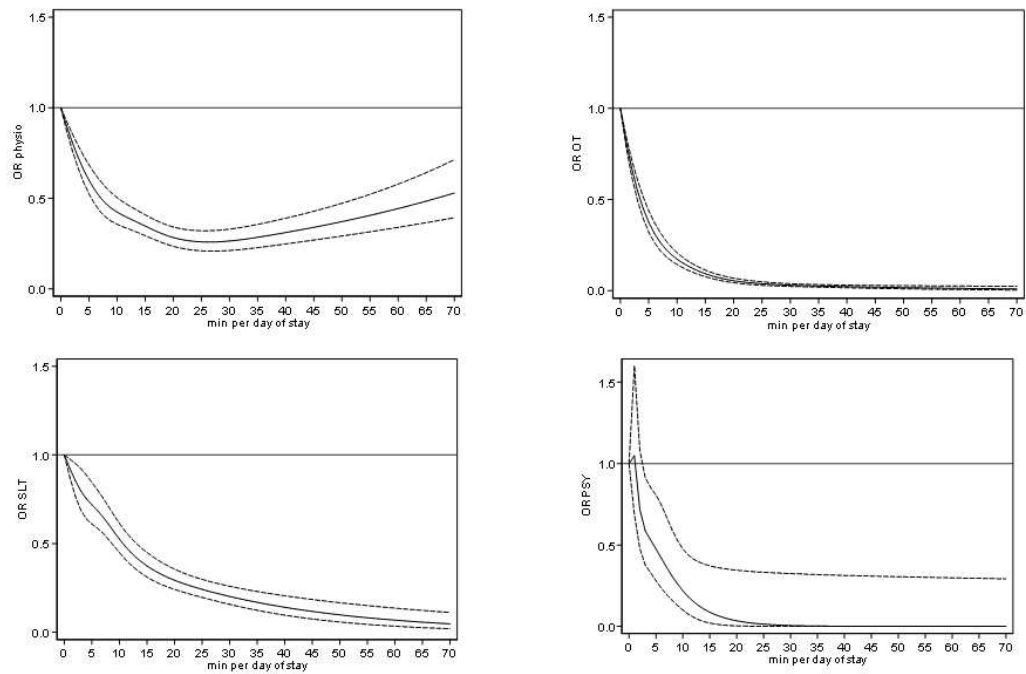

**Supplementary Table 5:** The full model associated with total therapy per day of stay and Disability, Home on Discharge, Mortality, and Length of inpatient stay– As produced from the single fully adjusted multilevel mixed effects ordinal logistic regression model.

| Total Therapy per day of stay              |     | Disability<br>(mRs)<br>N=104,163<br>OR(95% C.I.) | Home on<br>Discharge<br>N=104,163<br>OR(95% C.I.) | Mortality<br>N=104,163<br>OR(95% C.I.) | Length of Inpatient<br>Stay<br>N=104,163<br>RR(95% C.I.) |                    |
|--------------------------------------------|-----|--------------------------------------------------|---------------------------------------------------|----------------------------------------|----------------------------------------------------------|--------------------|
| Average Minutes of Therapy per Day of Stay |     | 0.995(0.994,0.994)                               | 1.000(0.999,1.001)                                | 0.966(0.964,0.964)                     | 0.990(0.990,0.990)                                       |                    |
| Patient received PT                        | Yes | 1.441(1.369,1.369)                               | 0.654(0.610,0.610)                                | 1.197(1.092,1.092)                     | 1.608(1.572,1.572)                                       |                    |
| Patient received OT                        | Yes | 0.527(0.503,0.503)                               | 1.805(1.696,1.696)                                | 0.302(0.281,0.281)                     | 1.720(1.688,1.688)                                       |                    |
| Patient received SLT                       | Yes | 1.703(1.658,1.658)                               | 0.632(0.609,0.609)                                | 1.416(1.339,1.339)                     | 1.684(1.665,1.665)                                       |                    |
| Patient received Clinical Psyc             | Yes | 1.363(1.291,1.291)                               | 0.952(0.883,0.883)                                | 0.465(0.401,0.401)                     | 2.066(2.020,2.020)                                       |                    |
| <b>Admission related factors</b>           |     |                                                  |                                                   |                                        |                                                          |                    |
| Team Count                                 |     | 0.971(0.907,0.907)                               | 1.135(1.028,1.028)                                | 0.814(0.713,0.713)                     | 1.063(1.033,1.033)                                       |                    |
| Time from Entry                            |     | 1.007(1.003,1.003)                               | 0.987(0.980,0.980)                                | 0.990(0.982,0.982)                     | 1.008(1.006,1.006)                                       |                    |
| Day of Entry (Mon)                         |     | Tuesday                                          | 0.987(0.948,0.948)                                | 0.996(0.942,0.942)                     | 0.928(0.855,0.855)                                       |                    |
|                                            |     | Wednesday                                        | 0.977(0.938,0.938)                                | 0.954(0.902,0.902)                     | 0.974(0.897,0.897)                                       |                    |
|                                            |     | Thursday                                         | 0.867(0.833,0.833)                                | 1.145(1.084,1.084)                     | 0.900(0.830,0.830)                                       | 0.951(0.935,0.935) |
|                                            |     | Friday                                           | 0.784(0.754,0.754)                                | 1.206(1.143,1.143)                     | 0.761(0.701,0.701)                                       | 0.936(0.921,0.921) |
|                                            |     | Saturday                                         | 0.931(0.893,0.893)                                | 1.021(0.964,0.964)                     | 0.894(0.821,0.821)                                       | 0.958(0.941,0.941) |
| Time from entry to 1st Stroke Unit         |     | 1.000(1.000,1.000)                               | 1.000(0.999,0.999)                                | 1.000(1.000,1.000)                     | 1.000(1.000,1.000)                                       |                    |
| Time of Entry(00.00-07.59)                 |     | 08:00+                                           | 0.837(0.808,0.808)                                | 1.187(1.129,1.129)                     | 0.833(0.776,0.776)                                       |                    |
|                                            |     | 16:00+                                           | 0.921(0.887,0.887)                                | 1.084(1.028,1.028)                     | 0.891(0.826,0.826)                                       | 0.952(0.937,0.937) |
| <b>Patient-related factors</b>             |     |                                                  |                                                   |                                        |                                                          |                    |
| Age                                        |     | 0.984(0.978,0.978)                               | 1.053(1.044,1.044)                                | 1.034(1.014,1.014)                     | 1.009(1.006,1.006)                                       |                    |
| Age Squared                                |     | 1.000(1.000,1.000)                               | 0.999(0.999,0.999)                                | 1.000(1.000,1.000)                     | 1.000(1.000,1.000)                                       |                    |
| Gender (Female)                            |     | Male                                             | 0.995(0.973,0.973)                                | 0.972(0.942,0.942)                     | 1.398(1.334,1.334)                                       |                    |
|                                            |     | Asian, inc.                                      | 0.967(0.908,0.908)                                | 1.383(1.261,1.261)                     | 0.654(0.552,0.552)                                       | 1.003(0.975,0.975) |
| Ethnicity (White)                          |     | Chinese                                          | 0.967(0.908,0.908)                                | 1.383(1.261,1.261)                     | 0.654(0.552,0.552)                                       |                    |
|                                            |     | black                                            | 1.128(1.040,1.040)                                | 1.005(0.888,0.888)                     | 0.842(0.673,0.673)                                       | 1.068(1.030,1.030) |



|                                                 |                  |                    |                    |                    |                    |
|-------------------------------------------------|------------------|--------------------|--------------------|--------------------|--------------------|
|                                                 | mixed            | 1.153(0.963,0.963) | 0.906(0.695,0.695) | 1.349(0.873,0.873) | 1.090(1.007,1.007) |
|                                                 | not known        | 1.031(0.980,0.980) | 0.953(0.888,0.888) | 0.914(0.817,0.817) | 0.996(0.975,0.975) |
|                                                 | other            | 0.990(0.909,0.909) | 1.199(1.052,1.052) | 0.874(0.700,0.700) | 1.000(0.962,0.962) |
| Social Deprivation Highest to Lowest (1)        | 2                | 0.986(0.954,0.954) | 1.021(0.975,0.975) | 0.998(0.932,0.932) | 0.999(0.985,0.985) |
|                                                 | 3                | 0.989(0.956,0.956) | 1.012(0.965,0.965) | 1.036(0.966,0.966) | 0.990(0.976,0.976) |
|                                                 | 4                | 0.973(0.938,0.938) | 1.061(1.009,1.009) | 1.021(0.948,0.948) | 0.993(0.978,0.978) |
|                                                 | Missing          | 0.917(0.847,0.847) | 1.327(1.191,1.191) | 0.761(0.646,0.646) | 0.948(0.916,0.916) |
| Congestive Heart Failure                        | Yes              | 1.190(1.135,1.135) | 0.972(0.908,0.908) | 1.575(1.454,1.454) | 0.970(0.951,0.951) |
| Hypertension                                    | Yes              | 0.967(0.945,0.945) | 1.046(1.014,1.014) | 0.952(0.909,0.909) | 1.018(1.008,1.008) |
| Atrial Fibrillation                             | Yes              | 1.084(1.054,1.054) | 0.984(0.947,0.947) | 1.374(1.308,1.308) | 1.004(0.992,0.992) |
| Diabetes                                        | Yes              | 1.132(1.101,1.101) | 0.946(0.911,0.911) | 1.177(1.112,1.112) | 1.022(1.010,1.010) |
| Previous Stroke/TIA?                            | Yes              | 0.945(0.921,0.921) | 1.121(1.083,1.083) | 0.883(0.840,0.840) | 0.978(0.968,0.968) |
| Disability at transfer from previous team (mRS) | 1                | 0.885(0.679,0.679) | 1.079(0.782,0.782) | 0.454(0.169,0.169) | 0.752(0.675,0.675) |
|                                                 | 2                | 1.337(1.058,1.058) | 0.937(0.708,0.708) | 1.188(0.586,0.586) | 0.918(0.836,0.836) |
|                                                 | 3                | 2.286(1.809,1.809) | 0.635(0.480,0.480) | 1.844(0.918,0.918) | 0.998(0.910,0.910) |
|                                                 | 4                | 4.011(3.176,3.176) | 0.457(0.346,0.346) | 2.856(1.425,1.425) | 1.125(1.026,1.026) |
|                                                 | 5                | 7.779(6.125,6.125) | 0.307(0.229,0.229) | 5.470(2.721,2.721) | 1.237(1.126,1.126) |
| Pre-morbid disability (mRS, 0)                  | 1                | 1.461(1.414,1.414) | 0.861(0.824,0.824) | 1.295(1.209,1.209) | 1.044(1.029,1.029) |
|                                                 | 2                | 2.164(2.084,2.084) | 0.726(0.688,0.688) | 1.519(1.411,1.411) | 1.056(1.039,1.039) |
|                                                 | 3                | 3.052(2.940,2.940) | 0.615(0.583,0.583) | 1.466(1.369,1.369) | 1.049(1.033,1.033) |
| Stroke Type (Infarction)                        | 4                | 4.401(4.191,4.191) | 0.543(0.504,0.504) | 1.244(1.145,1.145) | 0.984(0.964,0.964) |
|                                                 | 5                | 5.219(4.789,4.789) | 0.550(0.476,0.476) | 0.833(0.729,0.729) | 0.928(0.896,0.896) |
|                                                 | Haemorrhage      | 1.666(1.607,1.727) | 0.621(0.589,0.653) | 1.461(1.367,1.561) | 1.184(1.167,1.202) |
| Stroke Severity (NIHSS, Mild)                   | Moderate(5-14)   | 1.483(1.385,1.385) | 0.715(0.650,0.650) | 1.915(1.566,1.566) | 1.246(1.207,1.207) |
|                                                 | Severe(15-20)    | 2.327(2.133,2.133) | 0.473(0.417,0.417) | 2.744(2.207,2.207) | 1.350(1.300,1.300) |
|                                                 | Very Severe(>20) | 2.186(1.973,1.973) | 0.443(0.380,0.380) | 2.241(1.769,1.769) | 1.308(1.253,1.253) |
| Stroke Impairment Categories (Motor Only)       | Loss-Con         | 1.305(1.219,1.219) | 0.899(0.807,0.807) | 1.601(1.421,1.421) | 0.897(0.873,0.873) |
|                                                 | Mo-Co-Se         | 0.989(0.950,0.950) | 1.007(0.954,0.954) | 1.179(1.070,1.070) | 0.984(0.968,0.968) |
|                                                 | Mo-Co            | 0.900(0.867,0.867) | 1.094(1.041,1.041) | 1.077(0.979,0.979) | 0.934(0.919,0.919) |
|                                                 | Mo-Se            | 0.925(0.888,0.888) | 1.090(1.031,1.031) | 0.861(0.761,0.761) | 0.950(0.933,0.933) |

|                                          |              |                    |                    |                    |                           |
|------------------------------------------|--------------|--------------------|--------------------|--------------------|---------------------------|
|                                          | No-Mo        | 0.709(0.677,0.677) | 1.237(1.165,1.165) | 0.827(0.720,0.720) | 0.872(0.854,0.854)        |
|                                          | None         | 0.798(0.756,0.756) | 1.198(1.118,1.118) | 1.574(1.390,1.390) | 0.998(0.976,0.976)        |
| <b>Organisation- related factors</b>     |              |                    |                    |                    |                           |
| 72hr Swallow assess (No)                 | Yes          | 1.440(1.395,1.395) | 0.758(0.726,0.726) | 1.248(1.168,1.168) | 1.211(1.195,1.195)        |
| 72hr Clinical Assessment(No)             | Yes          | 0.847(0.833,0.833) | 1.101(1.077,1.077) | 0.902(0.876,0.876) | <b>0.898(0.892,0.892)</b> |
| Thrombolysis available (24hrs day)       | Non-24hrs/UA | 1.237(0.920,0.920) | 0.670(0.427,0.427) | 0.920(0.699,0.699) | 1.113(0.961,0.961)        |
| Ward Round 7d per wk                     | Yes          | 1.019(0.837,0.837) | 1.272(0.943,0.943) | 0.891(0.745,0.745) | 1.060(0.961,0.961)        |
| Median Length of stay in Unit            |              | 0.991(0.973,0.973) | 1.038(1.008,1.008) | 1.027(1.008,1.008) | 1.025(1.015,1.015)        |
|                                          | RATc         | 1.064(0.951,0.951) | 1.011(0.862,0.862) | 1.001(0.857,0.857) | 1.097(1.044,1.044)        |
| Team Type (RATa)                         | NRAT         | 0.988(0.691,0.691) | 0.837(0.489,0.489) | 0.957(0.657,0.657) | 0.876(0.736,0.736)        |
|                                          | NAIT         | 1.488(0.504,0.504) | 0.223(0.044,0.044) | 0.213(0.052,0.052) | 1.046(0.618,0.618)        |
| Qualified Nurses (WTE/ 10bds)            |              | 1.010(0.978,0.978) | 0.970(0.924,0.924) | 0.971(0.944,0.944) | 0.969(0.954,0.954)        |
| Nurse support workers (WTE/ 10bds)       |              | 0.943(0.903,0.903) | 1.025(0.959,0.959) | 1.033(0.992,0.992) | 1.048(1.025,1.025)        |
| No. Therapies available 6/7 days/ wk (0) | 1            | 0.904(0.699,0.699) | 1.097(0.741,0.741) | 1.169(0.922,0.922) | 1.084(0.954,0.954)        |
|                                          | 2 or more    | 1.077(0.893,0.893) | 0.968(0.727,0.727) | 1.148(0.969,0.969) | 0.987(0.899,0.899)        |
| Access to Social Wk in 5days (Yes)       | No           | 1.062(0.642,0.642) | 0.651(0.302,0.302) | 0.693(0.442,0.442) | 0.913(0.711,0.711)        |
| Access to ESD Team                       | Non-spec ESD | 0.925(0.672,0.672) | 1.649(1.013,1.013) | 1.013(0.753,0.753) | 1.014(0.865,0.865)        |
|                                          | None         | 1.016(0.809,0.809) | 2.082(1.473,1.473) | 1.009(0.818,0.818) | 1.115(0.996,0.996)        |
| Access to CRT                            | Yes          | 0.941(0.785,0.785) | 0.839(0.637,0.637) | 1.010(0.857,0.857) | 0.987(0.902,0.902)        |
| Constant                                 | Cut Point 1  | -1.53(-2.14,-0.93) |                    |                    |                           |
|                                          | Cut Point 2  | -0.17(-0.78,0.44)  |                    |                    |                           |
|                                          | Cut Point 3  | 0.76(0.16,1.37)    |                    |                    |                           |
|                                          | Cut Point 4  | 1.87(1.26,2.48)    |                    |                    |                           |
|                                          | Cut Point 5  | 3.39(2.78,3.99)    |                    |                    |                           |
|                                          | Cut Point 6  | 4.46(3.85,5.07)    |                    |                    |                           |
| Constant                                 |              |                    | 0.57(0.24,1.39)    | 0.008(0.003,0.027) | 3.44(2.58(4.58)           |
| Team                                     | Var(Cons)    | 0.29(0.24,0.36)    | 0.69(0.56,0.85)    | 0.21(0.17,0.27)    | 0.07(0.06,0.09)           |
| Overdispersion                           | ln(alpha)    |                    |                    |                    | -0.70(-0.71,-0.69)        |
